# Supplementary material for: Follow-up of Intervention to Prevent Dental Caries Among Indigenous Children in Australia: A Secondary Analysis of a Randomized Clinical Trial
Source: PubMed Central journal article supplement (PMC6902806; doi:10.1001/jamanetworkopen.2019.15611), 2019-11-27
Supplement: jamanetwopen-2-e1915611-s001.pdf [file jamanetwopen-2-e1915611-s001.pdf]

## Supplementary Online Content

Jamieson L, Smithers L, Hedges J, et al. Follow-up of intervention to prevent dental caries among indigenous children in Australia: a secondary analysis of a randomized clinical trial. *JAMA Netw Open*. 2019;2(11):e1915611. doi:10.1001/jamanetworkopen.2019.15611

**eTable.** Baseline Sample Characteristics by Follow-up and Loss-to-Follow-up at 5-Year Examinations

This supplementary material has been provided by the authors to give readers additional information about their work.

**eTable.** Baseline Sample Characteristics by Follow-up and Loss-to-Follow-up at 5-Year Examinations

|                                   | 5 year follow-up |                                |                              |          | 5 year loss to follow-up |                               |                             |          |
|-----------------------------------|------------------|--------------------------------|------------------------------|----------|--------------------------|-------------------------------|-----------------------------|----------|
|                                   | N (%)            |                                |                              | *p-value | N (%)                    |                               |                             | *p-value |
|                                   | Total (n=299)    | Immediate Intervention (n=156) | Delayed Intervention (n=143) |          | Total (n=137)            | Immediate Intervention (n=62) | Delayed Intervention (n=75) |          |
| <b>Maternal age</b>               |                  |                                |                              | 0.0260   |                          |                               |                             | 0.5792   |
| 14-24                             | 156 (52.2)       | 91 (58.3)                      | 65 (45.5)                    |          | 76 (55.5)                | 36 (58.1)                     | 40 (53.3)                   |          |
| 25+                               | 143 (47.8)       | 65 (41.7)                      | 78 (54.6)                    |          | 61 (44.5)                | 26 (41.9)                     | 35 (54.7)                   |          |
| <b>Education</b>                  |                  |                                |                              | 0.3503   |                          |                               |                             | 0.3282   |
| High school or less               | 203 (68.4)       | 109 (70.8)                     | 94 (65.7)                    |          | 111 (81.0)               | 48 (77.4)                     | 63 (84.0)                   |          |
| Trade or University               | 94 (31.7)        | 45 (29.2)                      | 49 (34.3)                    |          | 26 (19.0)                | 14 (22.6)                     | 12 (16.0)                   |          |
| <b>Income</b>                     |                  |                                |                              | 0.8617   |                          |                               |                             | 0.9657   |
| Job                               | 47 (15.9)        | 25 (16.2)                      | 22 (15.5)                    |          | 13 (9.6)                 | 6 (9.7)                       | 7 (9.5)                     |          |
| Centrelink                        | 249 (84.1)       | 129 (83.8)                     | 120 (84.5)                   |          | 123 (90.4)               | 56 (90.3)                     | 67 (90.5)                   |          |
| <b>HCC status</b>                 |                  |                                |                              | 0.9902   |                          |                               |                             | 0.7448   |
| Yes                               | 236 (80.8)       | 122 (80.8)                     | 114 (80.9)                   |          | 113 (85.6)               | 49 (84.5)                     | 64 (86.5)                   |          |
| No                                | 56 (19.2)        | 29 (19.2)                      | 27 (19.2)                    |          | 19 (14.4)                | 9 (15.5)                      | 10 (13.5)                   |          |
| <b>Residential location</b>       |                  |                                |                              | 0.1361   |                          |                               |                             | 0.7829   |
| Metropolitan                      | 132 (44.8)       | 63 (40.7)                      | 69 (49.3)                    |          | 35 (25.7)                | 15 (24.6)                     | 20 (26.7)                   |          |
| Non- metropolitan                 | 163 (55.2)       | 92 (59.3)                      | 71 (50.7)                    |          | 101 (74.3)               | 46 (75.4)                     | 55 (73.3)                   |          |
| <b>Usual reason visit dentist</b> |                  |                                |                              | 0.3109   |                          |                               |                             | 0.0268   |
| Problem                           | 184 (63.7)       | 92 (60.9)                      | 92 (66.7)                    |          | 83 (63.8)                | 45 (73.8)                     | 38 (55.1)                   |          |
| Check-up                          | 105 (36.3)       | 59 (39.1)                      | 46 (33.3)                    |          | 47 (36.2)                | 16 (26.2)                     | 31 (44.9)                   |          |
| <b>Brush yesterday</b>            |                  |                                |                              | 0.6922   |                          |                               |                             | 0.2102   |
| Yes                               | 217 (75.9)       | 116 (76.8)                     | 101 (74.8)                   |          | 96 (72.7)                | 39 (67.2)                     | 57 (77.0)                   |          |
| No                                | 69 (24.1)        | 35 (23.2)                      | 34 (25.2)                    |          | 36 (27.3)                | 19 (32.8)                     | 17 (23.0)                   |          |
| <b>Self-rated oral health</b>     |                  |                                |                              | 0.2597   |                          |                               |                             | 0.0183   |
| Excellent, very good or good      | 130 (43.5)       | 63 (40.4)                      | 67 (46.8)                    |          | 66 (48.2)                | 23 (37.1)                     | 43 (57.3)                   |          |
| Fair or poor                      | 169 (56.5)       | 93 (59.6)                      | 76 (53.2)                    |          | 71 (51.8)                | 39 (62.9)                     | 32 (42.7)                   |          |
| <b>Self-rated general health</b>  |                  |                                |                              | 0.2393   |                          |                               |                             | 0.8450   |
| Excellent, very good or good      | 272 (91.0)       | 139 (89.1)                     | 133 (93.0)                   |          | 119 (87.5)               | 53 (86.9)                     | 66 (88.0)                   |          |
| Fair or poor                      | 27 (9.0)         | 17 (10.9)                      | 10 (7.0)                     |          | 17 (12.5)                | 8 (13.1)                      | 9 (12.0)                    |          |

Note: \* Chi-square test
